# Supplementary material for: Targeting the ALK–CDK9-Tyr19 kinase cascade sensitizes ovarian and breast tumors to PARP inhibition via destabilization of the P-TEFb complex
Source: PubMed Central journal article supplement (PMC9586872; doi:10.1038/s43018-022-00438-2), 2022-10-17

Fig 3a

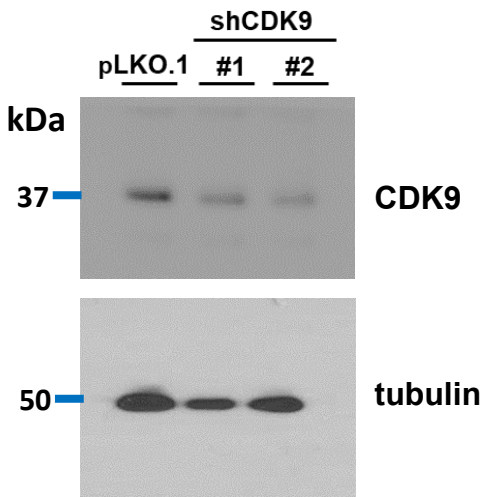

Fig 3e (left panel)

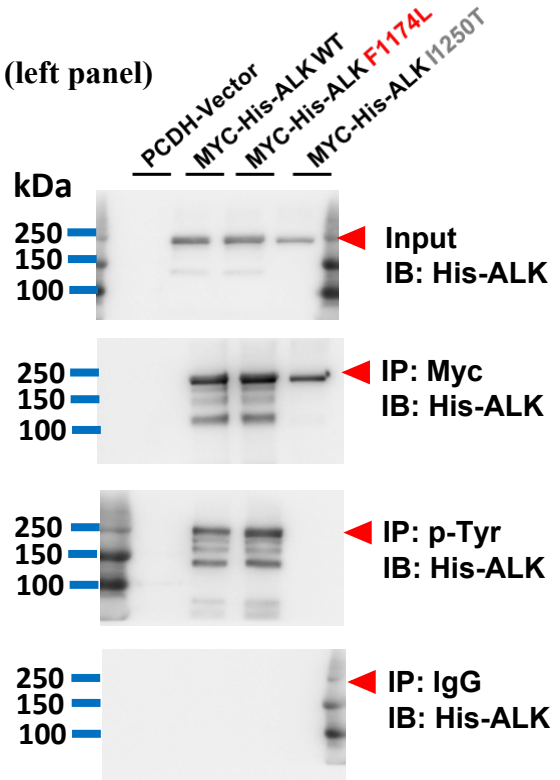

Fig 3e (right panel)

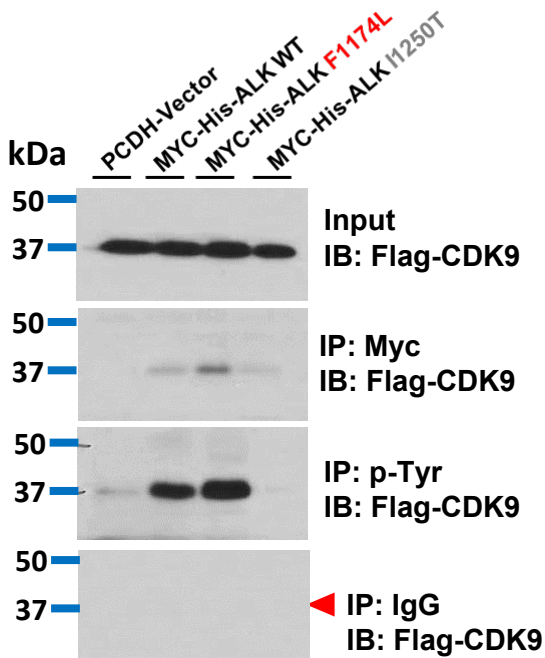

Fig 3f

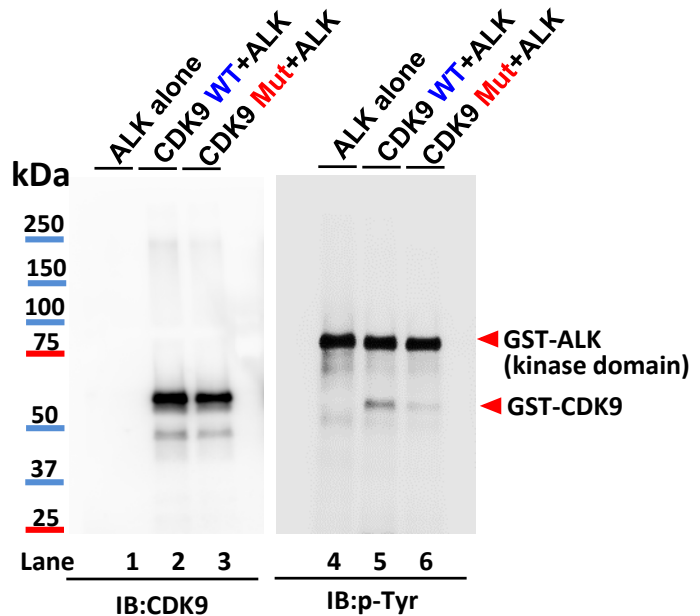

Fig 3g

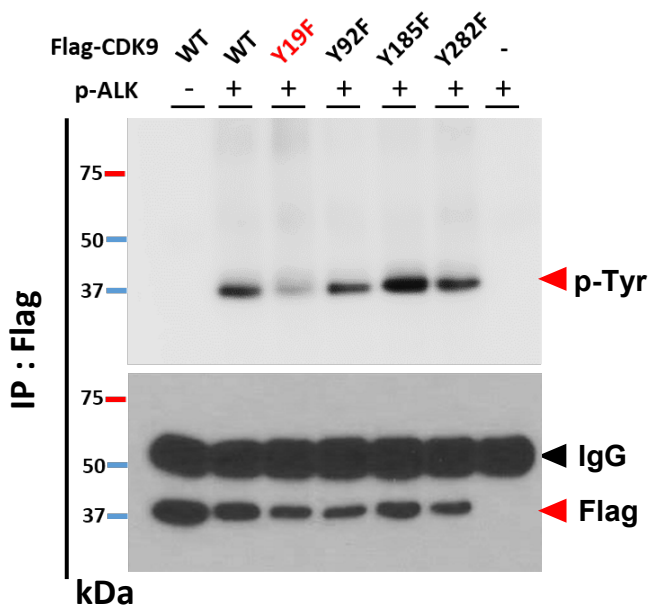

Fig 3i

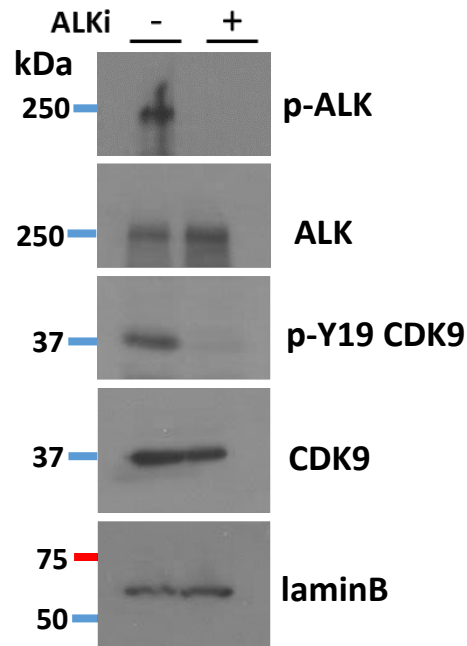

Fig 3h

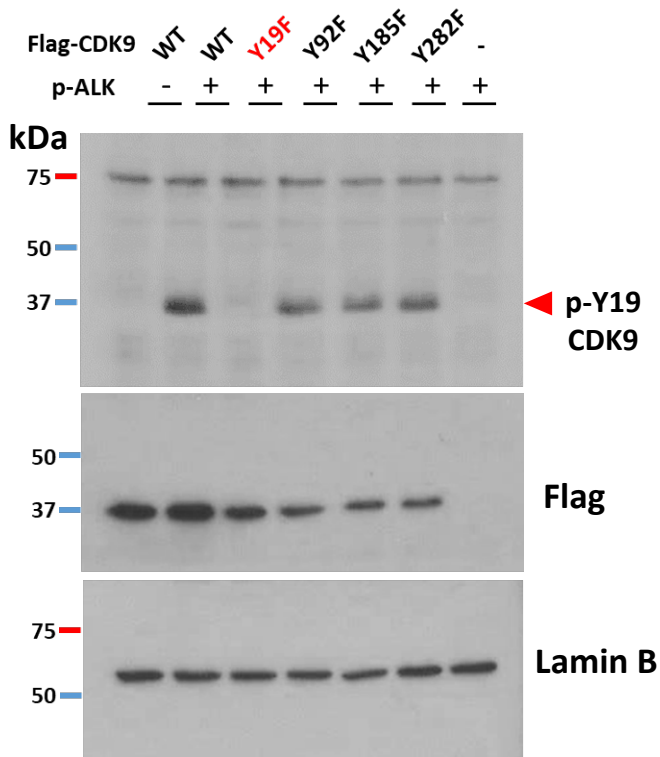

Fig 3j

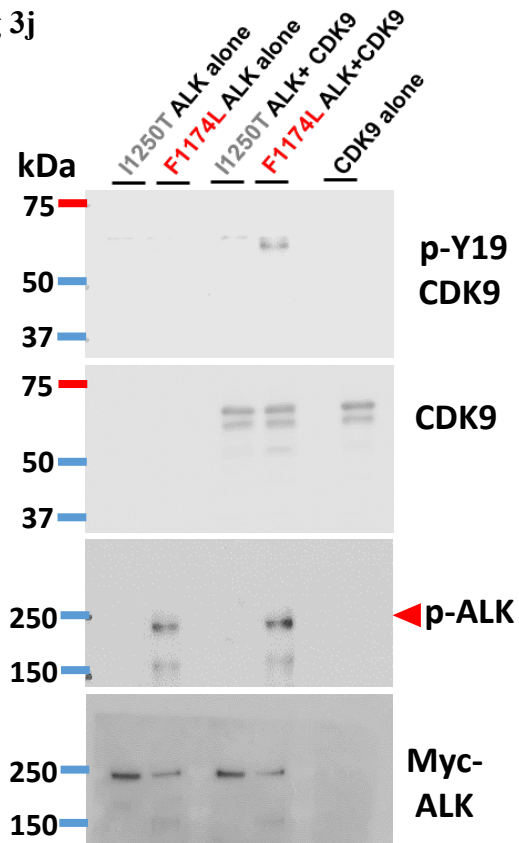

Supplement: 43018_2022_438_MOESM5_ESM.pdf [file 43018_2022_438_MOESM5_ESM.pdf]
