# Supplementary material for: Targeting the ALK–CDK9-Tyr19 kinase cascade sensitizes ovarian and breast tumors to PARP inhibition via destabilization of the P-TEFb complex
Source: PubMed Central journal article supplement (PMC9586872; doi:10.1038/s43018-022-00438-2), 2022-10-17

Fig 5a

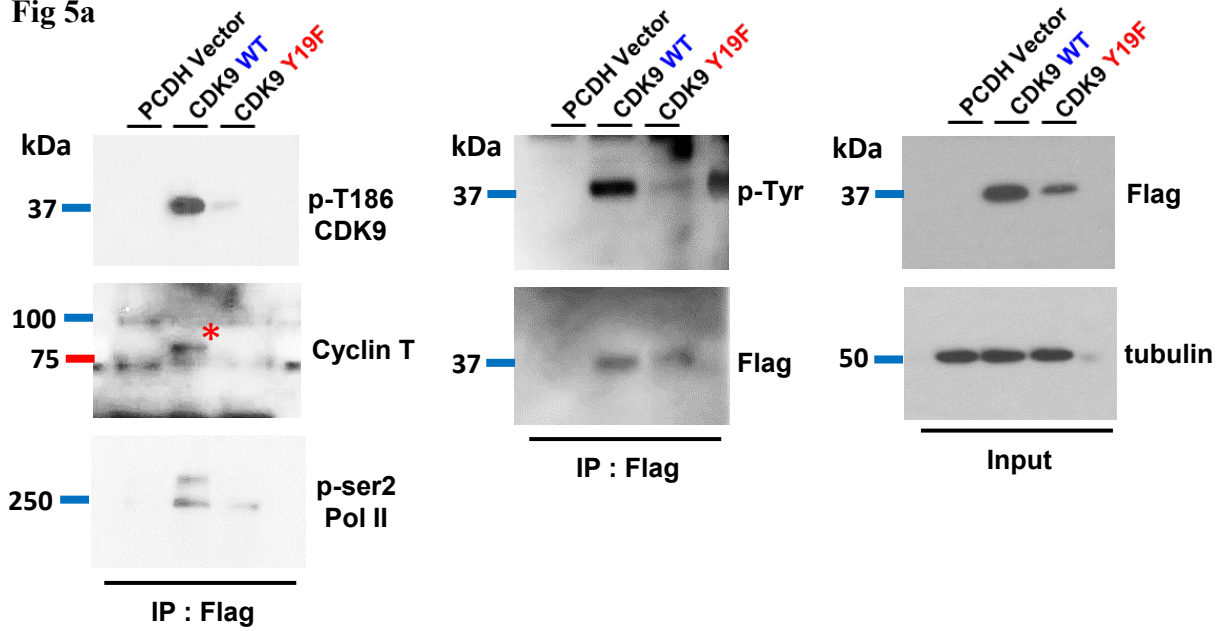

Fig 5b

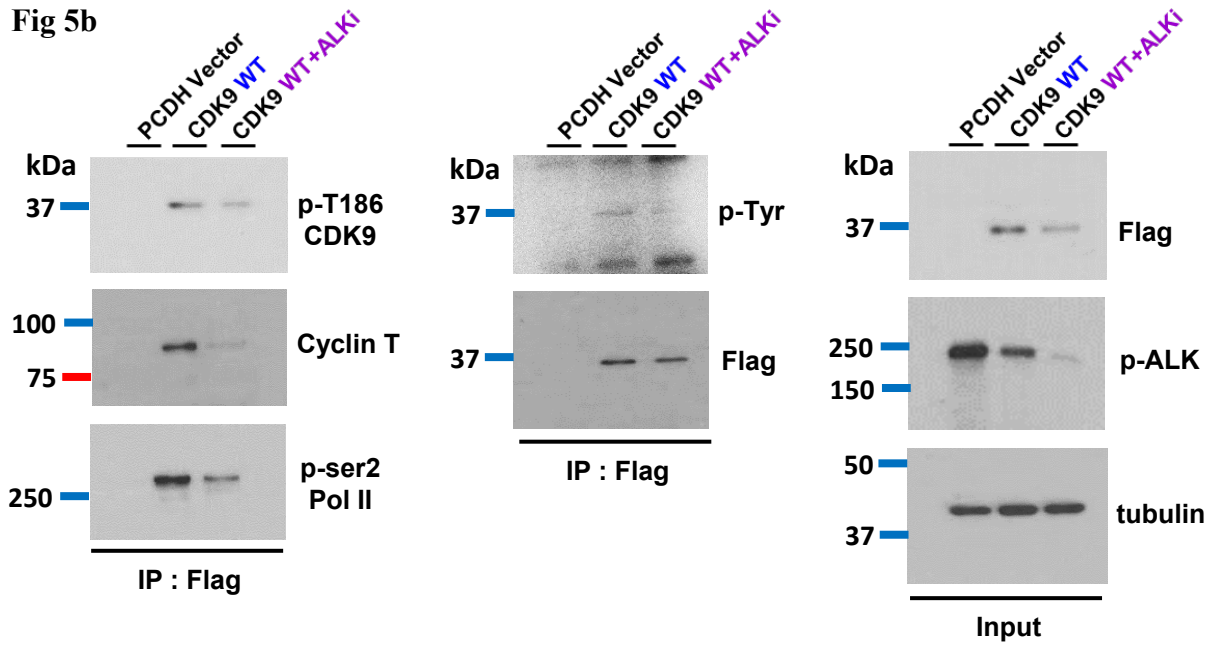

**Fig 5c**

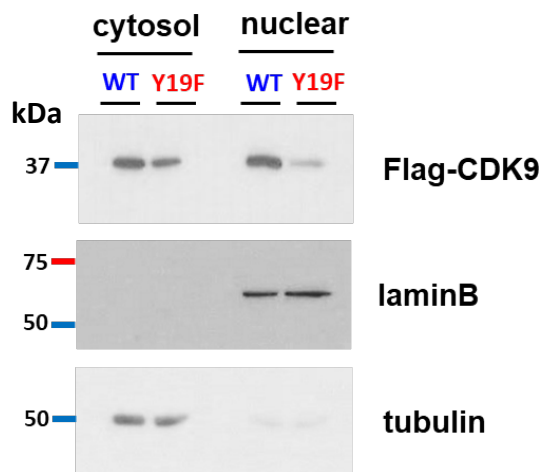

**Fig 5d**

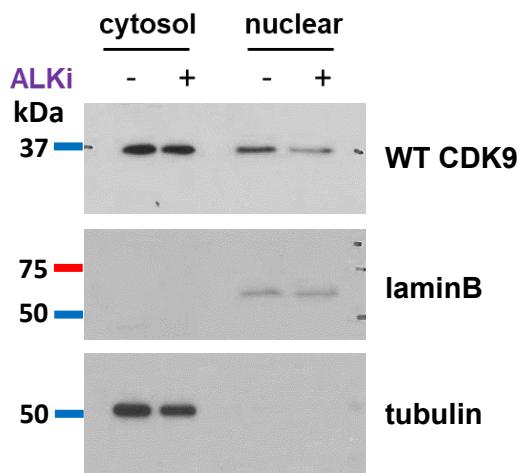

**Fig 5h**

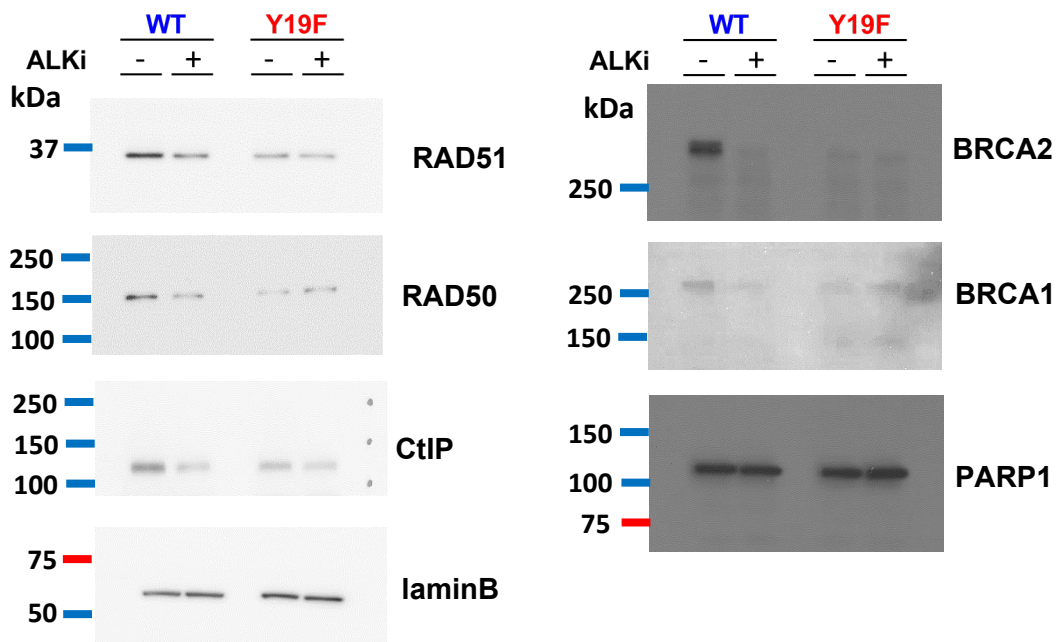

Fig 5i

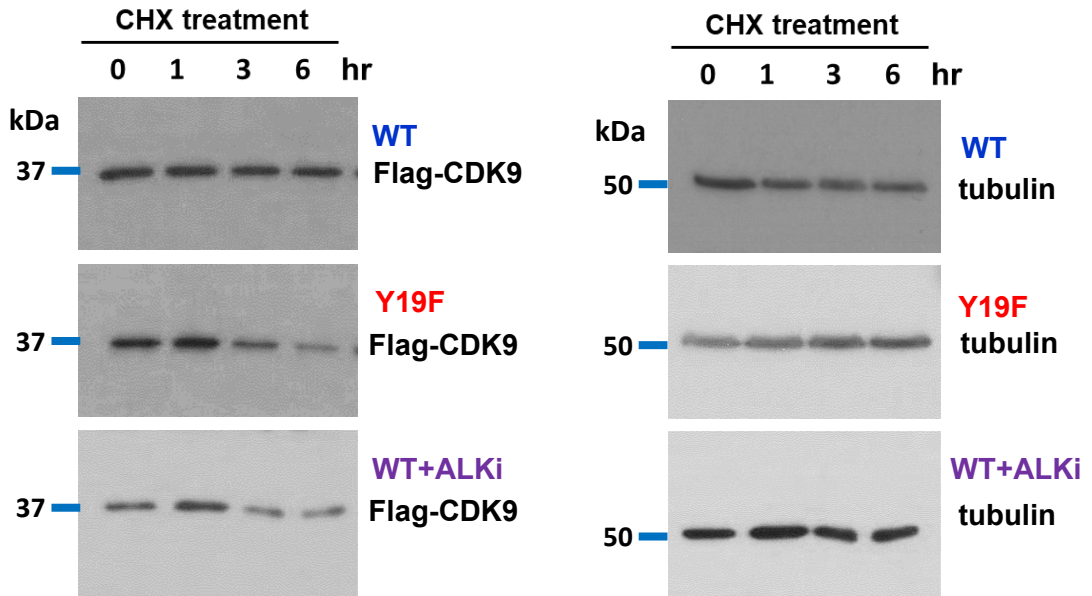

Fig 5j

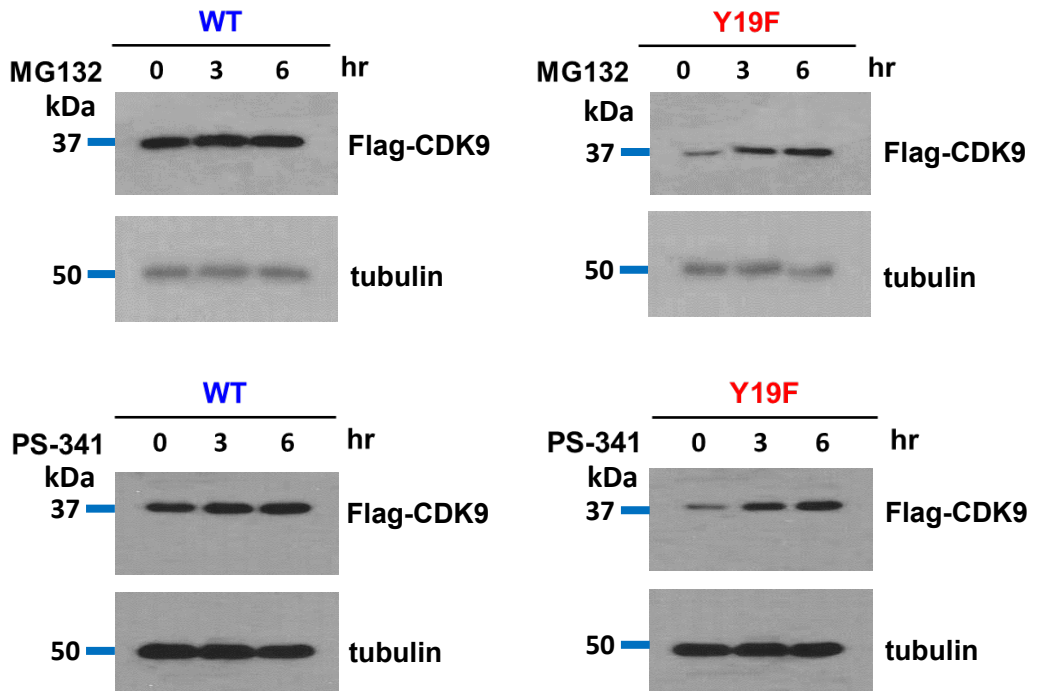

Fig 5k

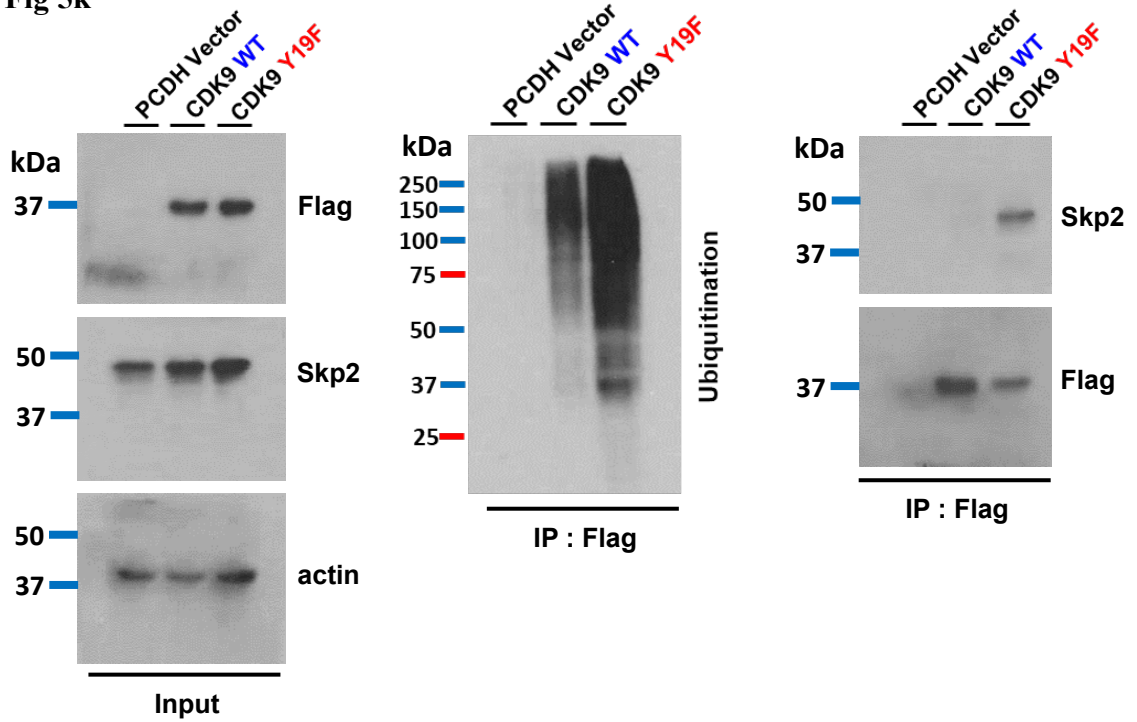

Fig 5l

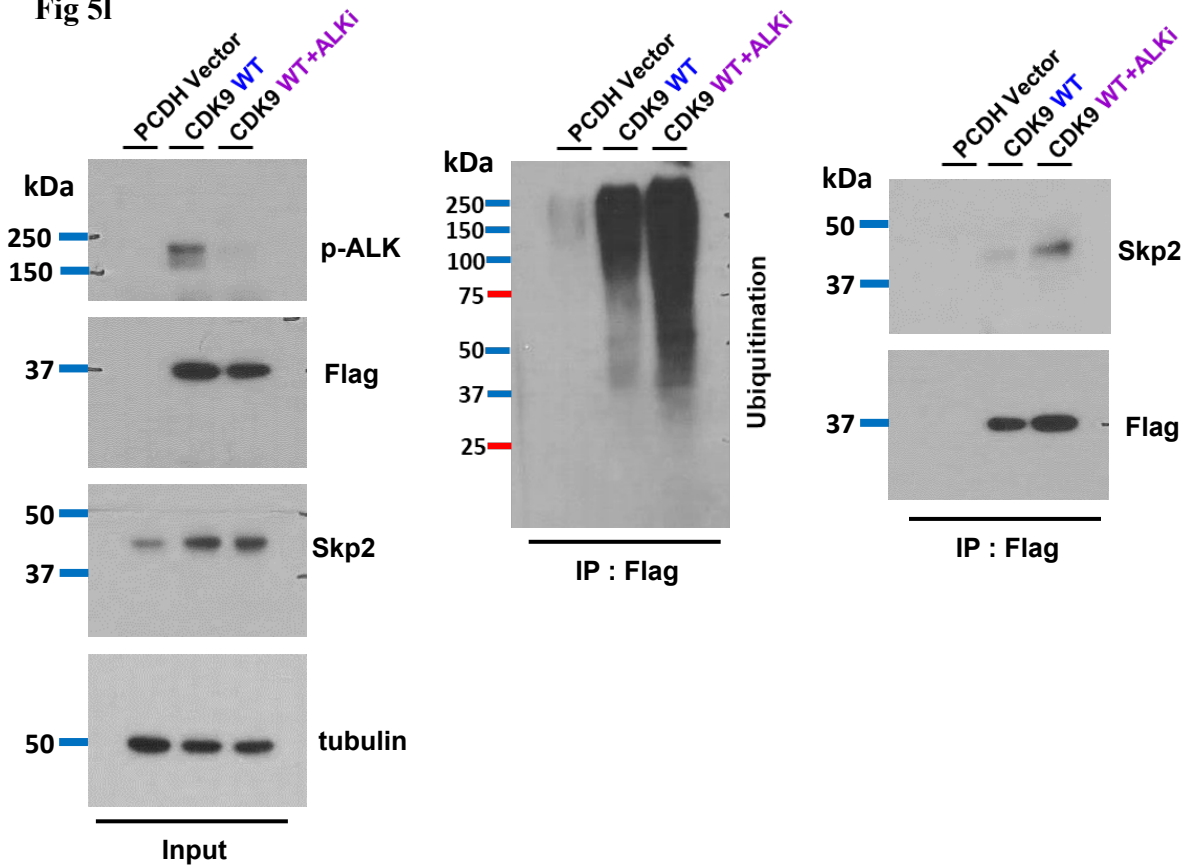

Supplement: 43018_2022_438_MOESM8_ESM.pdf [file 43018_2022_438_MOESM8_ESM.pdf]
