# Supplementary material for: Targeting the ALK–CDK9-Tyr19 kinase cascade sensitizes ovarian and breast tumors to PARP inhibition via destabilization of the P-TEFb complex
Source: PubMed Central journal article supplement (PMC9586872; doi:10.1038/s43018-022-00438-2), 2022-10-17

Extended Data Fig 4a

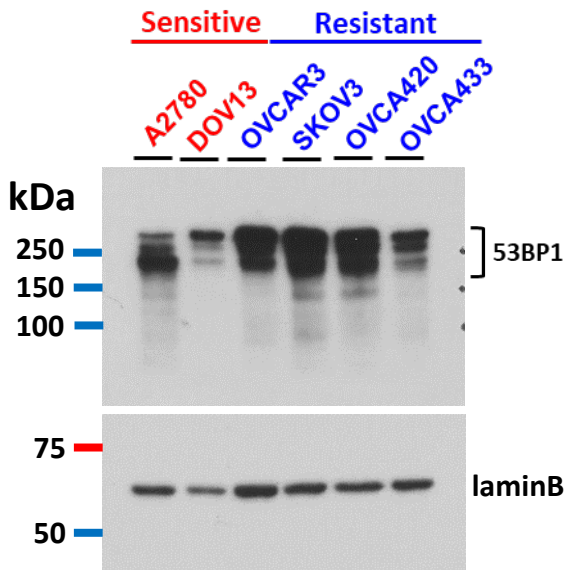

Extended Data Fig 4d

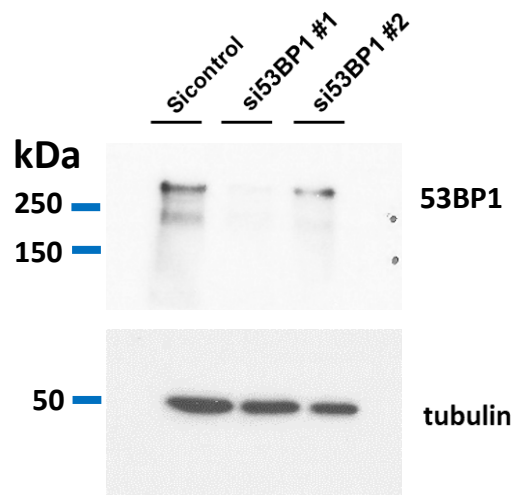

Supplement: 43018_2022_438_MOESM14_ESM.pdf [file 43018_2022_438_MOESM14_ESM.pdf]
