# Supplementary material for: Targeting the ALK–CDK9-Tyr19 kinase cascade sensitizes ovarian and breast tumors to PARP inhibition via destabilization of the P-TEFb complex
Source: Nat Cancer. 2022 Oct 17;3(10):1211–27. doi: 10.1038/s43018-022-00438-2 (PMC9586872; doi:10.1038/s43018-022-00438-2)
Supplement: Source Data Extended Data Fig. 8 — Unprocessed western blots. [file 43018_2022_438_MOESM20_ESM.pdf]

**Extended Data Fig 8b**

| kDa | control |      | MG132 |      |             |
|-----|---------|------|-------|------|-------------|
|     | WT      | Y19F | WT    | Y19F |             |
| 37  |         |      |       |      | Flag-CDK9   |
| 37  |         |      |       |      | p-T186 CDK9 |
| 50  |         |      |       |      | tubulin     |

**Extended Data Fig 8c**

|     | cytosol |      |       |      | nuclear |      |       |      |           |
|-----|---------|------|-------|------|---------|------|-------|------|-----------|
|     | control |      | MG132 |      | control |      | MG132 |      |           |
|     | WT      | Y19F | WT    | Y19F | WT      | Y19F | WT    | Y19F |           |
| kDa |         |      |       |      |         |      |       |      |           |
| 37  |         |      |       |      |         |      |       |      | Flag-CDK9 |
| 75  |         |      |       |      |         |      |       |      | laminB    |
| 50  |         |      |       |      |         |      |       |      |           |
| 50  |         |      |       |      |         |      |       |      | tubulin   |

**Extended Data Fig 8d**

| kDa | cytosol |      |       |      | nuclear |      |       |      |         |
|-----|---------|------|-------|------|---------|------|-------|------|---------|
|     | Control |      | MG132 |      | Control |      | MG132 |      |         |
|     | WT      | ALKi | WT    | ALKi | WT      | ALKi | WT    | ALKi |         |
|     |         |      |       |      |         |      |       |      |         |
| 37  |         |      |       |      |         |      |       |      | WT-CDK9 |
| 75  |         |      |       |      |         |      |       |      | laminB  |
| 50  |         |      |       |      |         |      |       |      | tubulin |
